# Supplementary material for: Construction of spindle structured CeO2 modified with rod-like attapulgite as a high-performance photocatalyst for CO2 reduction
Source: Royal Society of Chemistry journal article supplement (doi:10.1039/c9cy00824a), 2019-01-01
Supplement: c9cy00824a1.pdf [file c9cy00824a1.pdf]

**Construction of spindle structure CeO<sub>2</sub> modified with rodlike  
attapulgite as a high-performance photocatalyst for CO<sub>2</sub> reduction**

Jia Zheng<sup>a</sup>, Zhi Zhu<sup>b</sup>, Ge Gao<sup>a</sup>, Zhi Liu<sup>\*a</sup>, Yongsheng Yan<sup>b</sup>

- a. Faculty of Chemistry and Chemical Engineering, Liaoning Normal University, Dalian 116029, P.R. China
- b. Institute of the Green Chemistry and Chemical Technology, School of Chemistry and Chemical Engineering, Jiangsu University, Zhen Jiang 212000, P.R. China

\*Corresponding authors:

E-mail address: zhiliu@lnnu.edu.cn

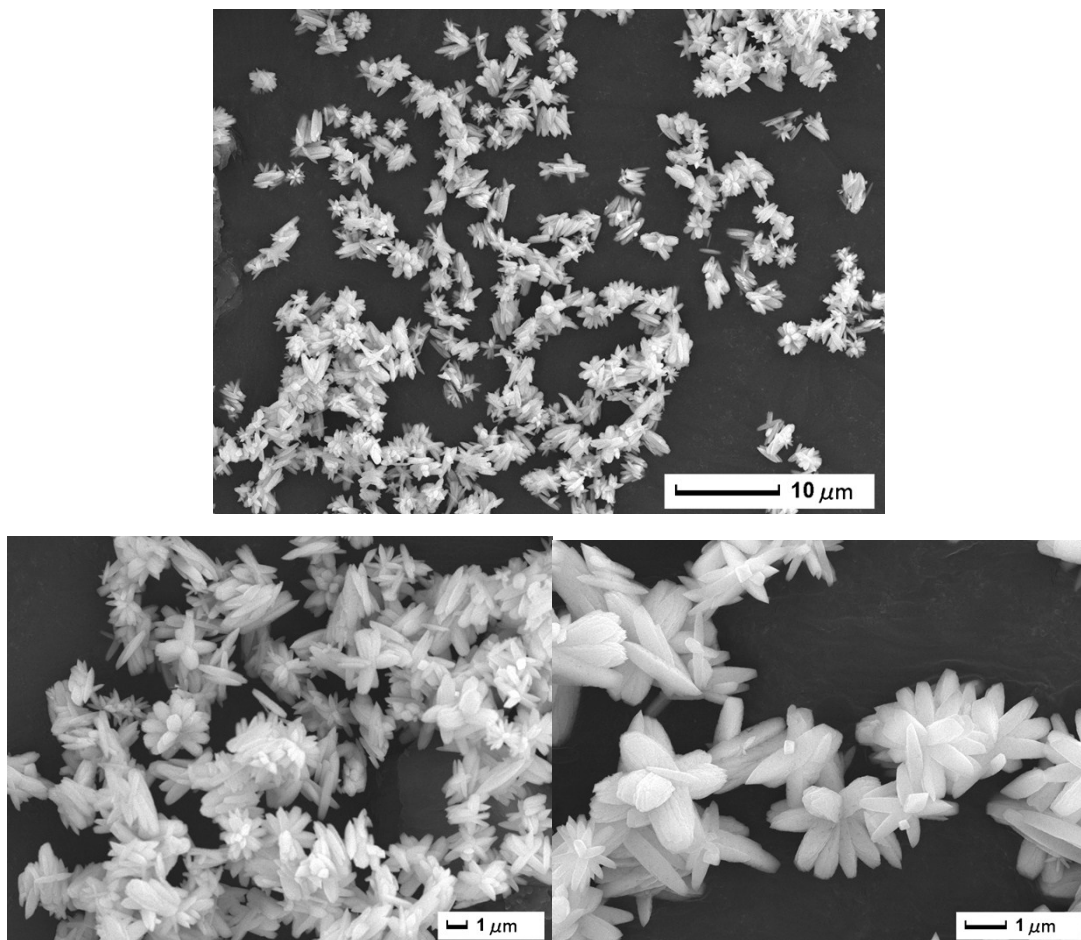

Fig. S1 SEM images of CeO<sub>2</sub>.

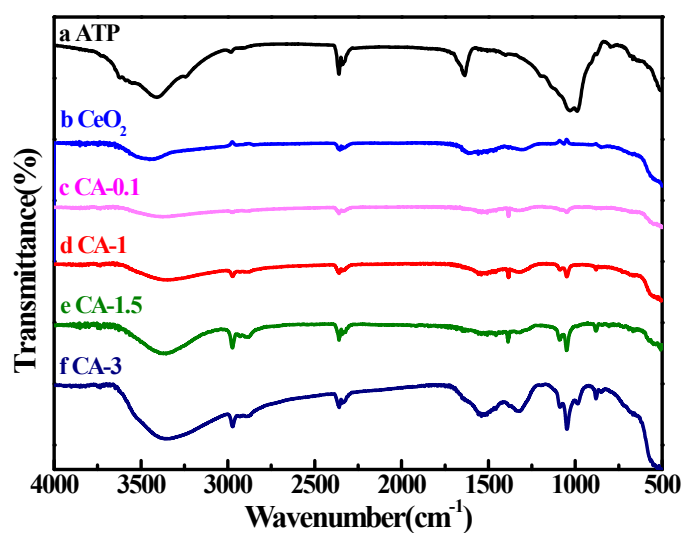

Fig. S2 FT-IR spectrum of (a) ATP, (b) CeO<sub>2</sub>, (c) CA-0.1, (d) CA-1, (e) CA-1.5, (f) CA-3.

**Table. S1** The BET and pore volume analysis of CeO<sub>2</sub> and CA-1.

| Sample           | Pore volume (cm <sup>3</sup> g <sup>-1</sup> ) | Average pore diameter (nm) | S <sub>BET</sub> (m <sup>2</sup> g <sup>-1</sup> ) |
|------------------|------------------------------------------------|----------------------------|----------------------------------------------------|
| CA-1             | 0.1108                                         | 5.3173                     | 101.4                                              |
| CeO <sub>2</sub> | 0.0504                                         | 2.9592                     | 82.8                                               |

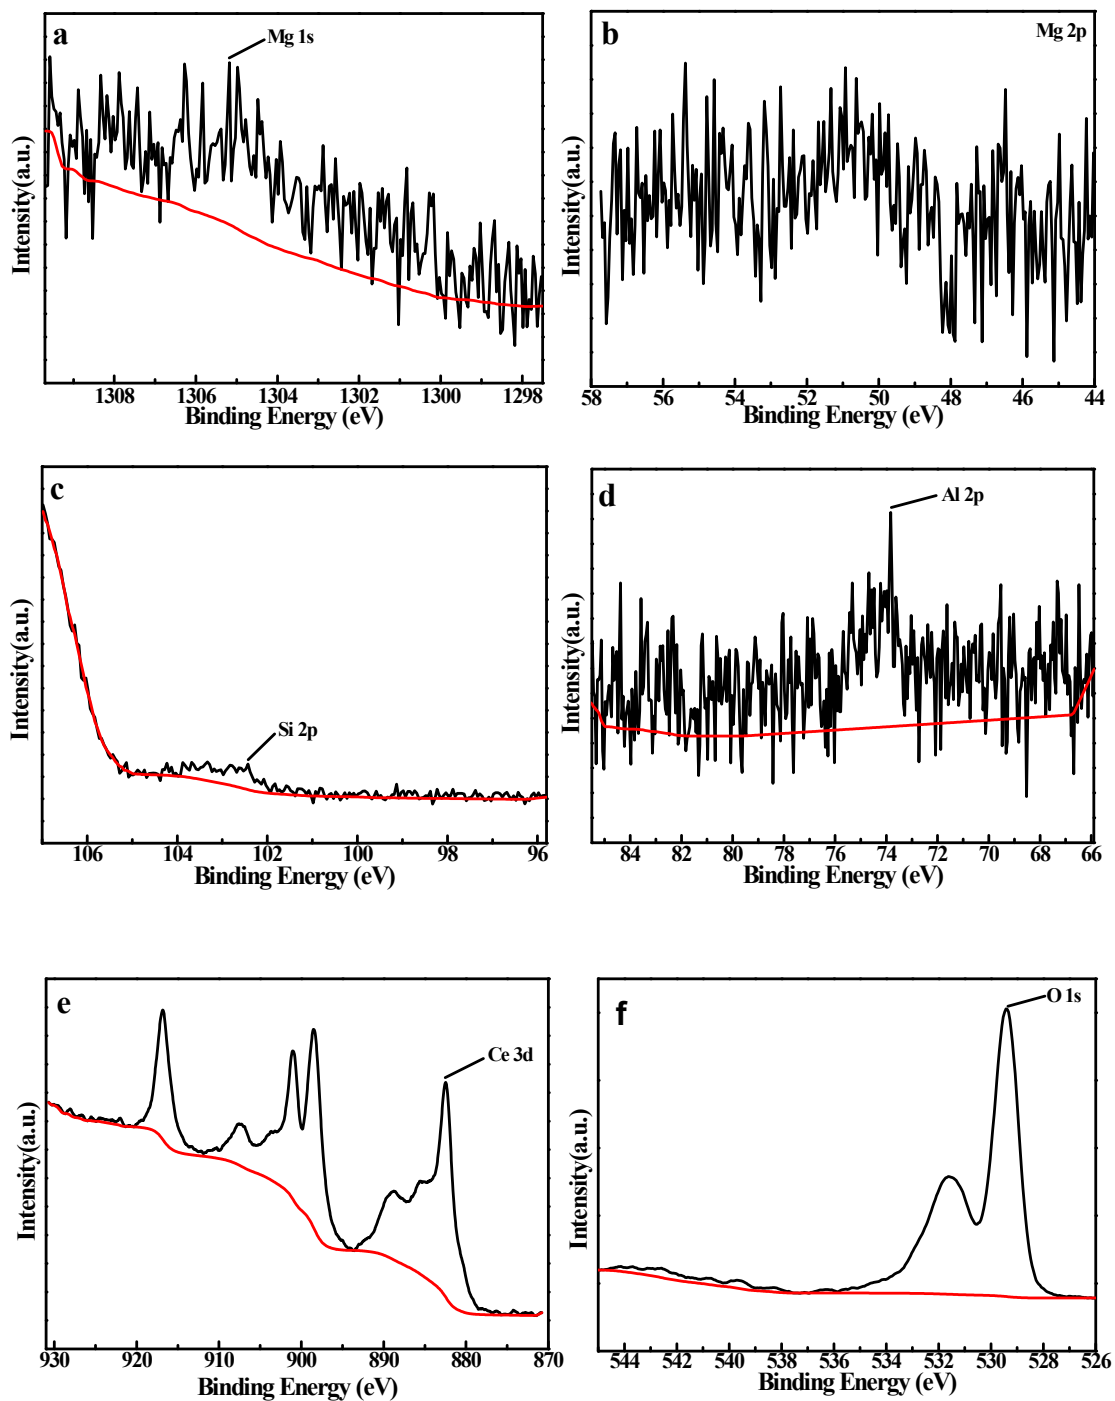

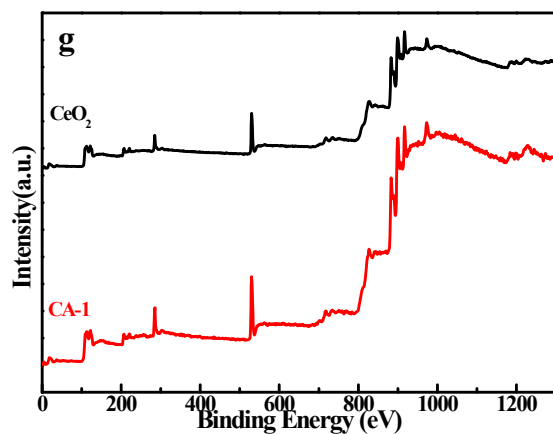

**Fig. S3** XPS spectra of the of as-prepared CA-1: (a) Mg 1s spectrum, (b) Mg 2p spectrum, (c) Si 2p spectrum, (d) Al 2p spectrum, (e) Ce 3d spectrum, (f) O 1s spectrum, (g) survey spectrum.

**Table. S2** Time-resolved fluorescence calculated average lifetimes of CeO<sub>2</sub> and CA-1.

| Sample           | A <sub>1</sub> | τ <sub>1</sub> | A <sub>2</sub> | τ <sub>2</sub> | τ    |
|------------------|----------------|----------------|----------------|----------------|------|
| CA-1             | 51.05          | 1.28           | 19.39          | 5.47           | 2.43 |
| CeO <sub>2</sub> | 20.52          | 6.17           | 227.54         | 1.01           | 1.44 |

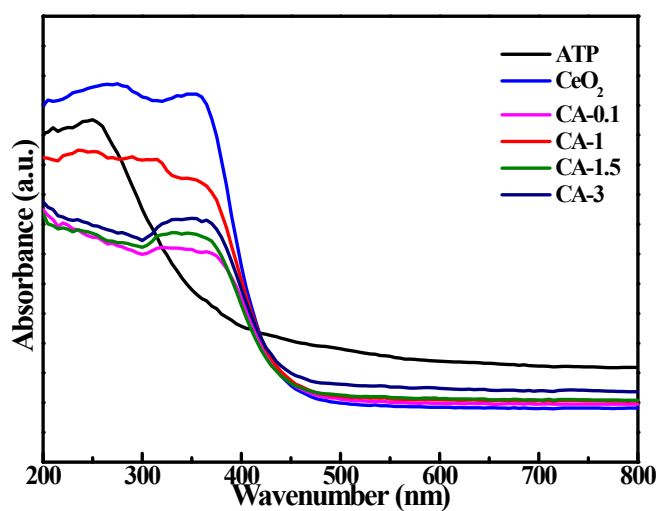

**Fig. S4** UV-vis absorption spectra of ATP, CeO<sub>2</sub>, CA-0.1, CA-1, CA-1.5, CA-3.
